# Supplementary material
Source: PubMed Central journal article supplement (PMC8121118)
Supplement: NIHMS1692296-supplement-1.pdf [file NIHMS1692296-supplement-1.pdf]

**Supplementary Table A.** Comparison of baseline characteristics between the enriched and the traditional premanifest samples using the Multivariate Risk Score (MRS)

|                            | <b>Enriched<br/>Sample</b> | <b>Traditional<br/>Sample</b> | <b><i>p</i>-value</b> |
|----------------------------|----------------------------|-------------------------------|-----------------------|
| <b>Age</b>                 |                            |                               | <0.0001               |
| Mean (SD)                  | 48.63 (11.06)              | 39.06 (9.93)                  |                       |
| <b>CAG</b>                 |                            |                               | <0.0001               |
| Mean (SD)                  | 43.98 (3.25)               | 41.88 (2.22)                  |                       |
| <b>TMS</b>                 |                            |                               | <0.0001               |
| Mean (SD)                  | 10.40 (6.16)               | 2.93 (3.12)                   |                       |
| <b>Stroop Word</b>         |                            |                               | <0.0001               |
| Mean (SD)                  | 86.93 (15.89)              | 103.12 (15.92)                |                       |
| <b>Stroop Color</b>        |                            |                               | <0.0001               |
| Mean (SD)                  | 67.75 (13.17)              | 80.67 (12.45)                 |                       |
| <b>Stroop Interference</b> |                            |                               | <0.0001               |
| Mean (SD)                  | 37.39 (8.50)               | 47.28 (9.64)                  |                       |
| <b>SDMT</b>                |                            |                               | <0.0001               |
| Mean (SD)                  | 41.26 (9.11)               | 54.03 (10.50)                 |                       |
| <b>Sex</b>                 |                            |                               | 0.5733                |
| male: n (%)                | 93 (37.5%)                 | 258 (35.3%)                   |                       |
| female: n (%)              | 155 (62.5%)                | 474 (64.7%)                   |                       |

|             |             |             |         |
|-------------|-------------|-------------|---------|
| <b>CAP</b>  |             |             | <0.0001 |
| low: n (%)  | 3 (1.2%)    | 278 (38.0%) |         |
| med: n (%)  | 37 (14.9%)  | 304 (41.5%) |         |
| high: n (%) | 208 (83.9%) | 150 (20.5%) |         |
| <b>DCL</b>  |             |             | <0.0001 |
| 0: n (%)    | 11 (4.4%)   | 376 (51.4%) |         |
| 1: n (%)    | 121 (48.8%) | 302 (41.3%) |         |
| 2: n (%)    | 73 (29.4%)  | 53 (7.2%)   |         |
| 3: n (%)    | 43 (17.4%)  | 1 (0.1%)    |         |

CAG=cytosine adenine guanine repeat length; TMS=Total Motor Score; SDMT = Symbol Digit

Modalities Test; CAP = CAG by Age Product; DCL = Diagnostic Confidence Level

**Supplementary Table B.** Comparison of brain structural volume data at study entry between the enriched and traditional samples

| Variable    | Baseline Mean      |                       | Percent Difference<br>(Traditional –<br>Enriched sample)<br>/Enriched sample<br>(%) | <i>p</i> -value |
|-------------|--------------------|-----------------------|-------------------------------------------------------------------------------------|-----------------|
|             | Enriched<br>Sample | Traditional<br>Sample |                                                                                     |                 |
| Putamen     | 0.00378            | 0.00495               | 30.95                                                                               | <0.0001         |
| Globus      | 0.00116            | 0.00152               | 31.03                                                                               | <0.0001         |
| Caudate     | 0.00303            | 0.00385               | 27.06                                                                               | <0.0001         |
| Accumbens   | 0.00035            | 0.00043               | 22.86                                                                               | <0.0001         |
| CSF         | 0.0864             | 0.0712                | -17.59                                                                              | <0.0001         |
| Thalamus    | 0.01099            | 0.01129               | 2.73                                                                                | 0.0001          |
| Cgm         | 0.26632            | 0.27102               | 1.76                                                                                | 0.0002          |
| Frontal_g   | 0.05485            | 0.05622               | 2.50                                                                                | 0.0003          |
| Temporal_g  | 0.06609            | 0.06749               | 2.12                                                                                | 0.0004          |
| Cwm         | 0.36068            | 0.36645               | 1.60                                                                                | 0.0010          |
| Occipital_g | 0.03973            | 0.04049               | 1.91                                                                                | 0.0077          |
| Occipital_w | 0.02821            | 0.02880               | 2.09                                                                                | 0.0084          |
| Temporal_w  | 0.04479            | 0.04543               | 1.43                                                                                | 0.0103          |
| Frontal_w   | 0.13824            | 0.13999               | 1.27                                                                                | 0.0244          |
| Parietal_g  | 0.06490            | 0.06571               | 1.25                                                                                | 0.0498          |

|             |         |         |      |        |
|-------------|---------|---------|------|--------|
| Parietal_w  | 0.08713 | 0.08806 | 1.07 | 0.0698 |
| Hippocampus | 0.00517 | 0.00519 | 0.39 | 0.6473 |

CSF = cerebral spinal fluid; Cgm = Cortical gray matter; g = gray matter; Cwm = Cortical white matter; w = white matter;

**Supplementary Table C.** Longitudinal analysis for comparing the brain volume loss between enriched and traditional samples

| Variable    | Percent Annual Change |                    | Percent Difference                                    | <i>p</i> -value |
|-------------|-----------------------|--------------------|-------------------------------------------------------|-----------------|
|             | Enriched Sample       | Traditional Sample | (Traditional – Enriched sample) / Enriched sample (%) |                 |
| Accumbens   | -0.02586              | -0.01375           | -46.83                                                | <0.0001         |
| Putamen     | -0.02526              | -0.01822           | -27.87                                                | <0.0001         |
| Thalamus    | -0.0076               | -0.0045            | -40.79                                                | <0.0001         |
| Globus      | -0.02176              | -0.01630           | -25.09                                                | <0.0001         |
| Occipital_g | -0.00436              | -0.00238           | -45.41                                                | 0.0002          |
| Parietal_w  | -0.00375              | -0.00082           | -78.13                                                | 0.0003          |
| Cwm         | -0.00321              | -0.00084           | -73.83                                                | 0.0003          |
| Frontal_w   | -0.00228              | 0.00036            | -115.79                                               | 0.0011          |
| Temporal_w  | -0.00351              | -0.00183           | -47.86                                                | 0.0075          |
| Frontal_g   | -0.00656              | -0.00507           | -22.71                                                | 0.0146          |
| Caudate     | -0.01356              | -0.0162            | 19.47                                                 | 0.0164          |
| Cgm         | -0.00464              | -0.00359           | -22.63                                                | 0.0231          |
| Occipital_w | -0.00274              | -0.00124           | -54.74                                                | 0.0375          |

|             |          |          |        |        |
|-------------|----------|----------|--------|--------|
| Temporal_g  | -0.00433 | -0.00319 | -26.33 | 0.0400 |
| CSF         | 0.03591  | 0.0308   | -14.23 | 0.0892 |
| Hippocampus | -0.00006 | -0.00089 | 138.33 | 0.1195 |
| Parietal_g  | -0.00439 | -0.00367 | -16.40 | 0.2635 |

SEA = Sample Enrichment Algorithm; CSF = cerebral spinal fluid; Cgm = Cortical gray matter;

g = gray matter; Cwm = Cortical white matter; w = white matter;
